# Supplementary material for: Influence of Sodium Bisulfite and Lithium Bromide Solutions on the Shape Fixation of Camel Guard Hairs in Slenderization Process
Source: Hindawi journal article supplement (doi:10.1155/2016/4803254), 2016-01-01
Supplement: f1 [file 4803254.f1.pdf]

## Influences of water, sodium bisulfite and lithium bromide solutions on tensile behaviors of camel guard hairs

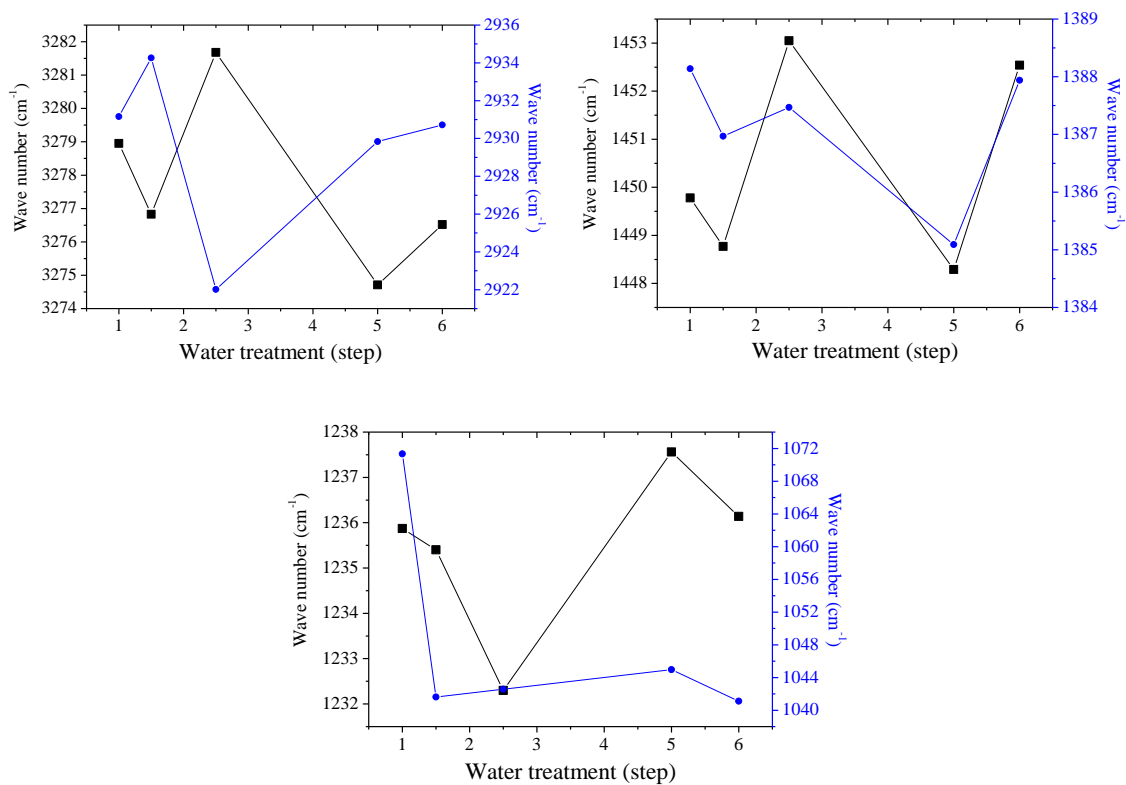

Scheme-1 Characteristic IR peaks of camel hair fiber along water-induced shape memory program steps

Table-4 Summary of IR characteristic peaks of camel hair fiber treated by LiBr and NaHSO<sub>3</sub> solutions along with shape memory program steps

| Treatment on hair  | Step | FT-IR wave number (cm <sup>-1</sup> ) |      |      |      |      |      |
|--------------------|------|---------------------------------------|------|------|------|------|------|
| LiBr (1.2 M, 1day) | 1    | 3279                                  | 2931 | 1450 | 1388 | 1236 | 1071 |
|                    | 1.5  | 3277                                  | 2964 | 1450 | 1402 | 1239 | 1044 |
|                    | 2.5  | 3286                                  | 2960 | 1453 | 1414 | 1237 | 1034 |

|                                        |     |      |      |      |      |      |      |     |
|----------------------------------------|-----|------|------|------|------|------|------|-----|
|                                        | 5   | 3286 | 2965 | 1445 | 1397 | 1239 | 1036 |     |
|                                        | 6   | 3285 | 2930 | 1443 | 1387 | 1235 | 1035 |     |
|                                        | 1   | 3279 | 2931 | 1450 | 1388 | 1236 | 1071 | 927 |
| NaHSO <sub>3</sub><br>(1.2 M,<br>1day) | 1.5 | 3286 | 2965 | 1444 | 1197 | 1086 | 1024 | 956 |
|                                        | 2.5 | 3286 | 2962 | 1446 | 1195 | 1106 | 1023 | 961 |
|                                        | 5   | 3285 | 2963 | 1444 | 1196 | 1113 | 1024 | 961 |
|                                        | 6   | 3291 | 2928 | 1453 | 1195 | 1109 | 1022 | 931 |
